# Supplementary material for: Plasma cell-free DNA (cfDNA) as a predictive and prognostic marker in patients with metastatic breast cancer
Source: Breast Cancer Res. 2019 Dec 19;21:149. doi: 10.1186/s13058-019-1235-8 (PMC6924016; doi:10.1186/s13058-019-1235-8)
Supplement: Supplementary file 1 — Additional file 1: Composite table with information of all the 194 samples included in the study. Information about the whole dataset included in the study. [file 13058_2019_1235_MOESM1_ESM.xlsx]

## Sheet: Supplementary Table 1
	Supplementary Table 1. Composite table with information of all the 194 samples included in the study.
Record ID	Sample ID	Age (y)	Start time (collection)	End of study	Status	Follow up time (months)	Progression	Date of progression	Progression follow up time (months)	ER status	PR status	HER2 status	CTC counts	cfDNA yield	CA15-3 levels	AP levels	Response	Endocrine	Chemotherapy	HER2-targeted therapy	Off treatment
71	ONC_CC_11_004001120	51	2012-12-05	2017-07-31	Alive	56	Progression	2013-06-05	6	Positive	Positive	Positive	0	0.003	16	108	Stable	No	No	HER2 therapy	No
74	ONC_CC_11_004001126	57	2013-01-30	2017-07-31	Alive	54	-	-	-	Negative	Negative	Negative	0	0.016	19	111	Stable	No	Chemotherapy	No	No
154	ONC_CC_11_004001289	76	2014-07-23	2017-07-31	Alive	36	-	-	-	Positive	Positive	Negative	0	0.022	11	92	Stable	Endocrine	No	No	No
96	ONC_CC_11_004001166	68	2013-06-17	2017-07-31	Alive	49	-	-	-	Positive	Positive	Positive	0	0.03	20	78	Stable	No	No	No	Off
169	ONC_CC_11_004001326	69	2014-11-27	2017-07-31	Alive	32	Progression	2016-04-01	16	Positive	Positive	Negative	0	0.036	1	69	Stable	Endocrine	No	No	No
163	ONC_CC_11_004001306	68	2014-09-08	2017-07-31	Alive	35	Progression	2016-11-01	25	Positive	Negative	-	0	0.04	27	84	Stable	Endocrine	No	No	No
156	ONC_CC_11_004001293	73	2014-07-30	2017-07-31	Alive	36	Progression	2015-07-01	11	Positive	Positive	Negative	0	0.041	31	46	Stable	Endocrine	No	No	No
99	ONC_CC_11_004001171	52	2013-06-19	2017-07-31	Alive	49	Negative	2017-05-08	46	Positive	Positive	Positive	0	0.043	24	103	Stable	No	No	HER2 therapy	No
121	ONC_CC_11_004001216	88	2014-01-13	2015-07-08	Deceased	18	Progression	2014-07-16	6	Positive	Negative	Positive	0	0.049	29	53	Stable	Endocrine	No	No	No
119	ONC_CC_11_004001212	49	2014-01-08	2017-07-31	Alive	43	Progression	2014-06-27	5	Positive	Positive	Negative	0	0.052	13	56	Stable	Endocrine	No	No	No
203	ONC_CC_11_004001417	59	2015-09-02	2017-07-31	Alive	23	Negative	2017-05-08	20	Negative	Negative	Positive	0	0.064	11	58	Stable	No	No	No	Off
116	ONC_CC_11_004001209	69	2014-01-08	2017-07-31	Alive	43	-	-	-	Positive	-	-	0	0.067	8	72	Stable	Endocrine	No	No	No
101	ONC_CC_11_004001174	74	2013-06-28	2017-07-31	Alive	49	Progression	2013-06-28	0	-	-	-	0	0.069	11	88	Stable	No	No	No	Off
236	ONC_CC_11_004001543	55	2016-07-05	2017-07-31	Alive	13	Negative	2017-05-08	10	Negative	Negative	Positive	0	0.07	14	95	Stable	No	No	No	Off
110	ONC_CC_11_004001193	52	2013-10-09	2017-07-31	Alive	46	Progression	2015-07-09	21	Positive	Positive	Positive	0	0.074	25	57	Stable	No	No	HER2 therapy	No
65	ONC_CC_11_004001114	65	2012-11-21	2017-07-31	Alive	56	-	-	-	Negative	Negative	Negative	0	0.091	11	60	Stable	No	No	No	Off
220	ONC_CC_11_004001477	85	2016-02-24	2017-07-31	Alive	17	Progression	2016-08-01	5	Positive	Positive	Negative	0	0.098	17	41	Stable	Endocrine	No	No	No
199	ONC_CC_11_004001413	66	2015-07-30	2017-07-31	Alive	24	Negative	2017-05-08	21	Negative	Positive	Negative	0	0.105	8	81	Stable	Endocrine	No	No	No
58	ONC_CC_11_004001107	49	2012-11-05	2017-07-31	Alive	57	Progression	2013-05-29	6	Positive	Positive	Negative	0	0.108	18	68	Stable	Endocrine	No	No	No
126	ONC_CC_11_004001225	87	2014-01-27	2015-03-04	Deceased	13	-	-	-	Positive	Positive	-	0	0.108	17	40	Stable	Endocrine	No	No	No
213	ONC_CC_11_004001440	55	2015-11-16	2017-07-31	Alive	20	-	-	-	Positive	Positive	Negative	0	0.111	21	55	Stable	No	Chemotherapy	No	No
153	ONC_CC_11_004001286	66	2014-07-23	2017-07-31	Alive	36	-	-	-	Positive	-	Negative	0	0.117	16	49	Stable	Endocrine	No	No	No
201	ONC_CC_11_004001415	88	2015-08-27	2017-07-31	Alive	23	-	-	-	Positive	Positive	Negative	0	0.118	13	91	Stable	Endocrine	No	No	No
132	ONC_CC_11_004001239	73	2014-02-26	2017-07-31	Alive	41	-	-	-	Positive	Negative	Negative	0	0.126	17	101	Stable	Endocrine	No	No	No
195	ONC_CC_11_004001407	81	2015-07-02	2017-07-31	Alive	25	-	-	-	Positive	Positive	Negative	0	0.158	15	117	Stable	Endocrine	No	No	No
227	ONC_CC_11_004001524	72	2016-06-08	2017-07-31	Alive	14	Progression	2016-11-09	5	Positive	Positive	Negative	0	0.164	29	77	Stable	Endocrine	No	No	No
81	ONC_CC_11_004001133	32	2013-02-11	2017-07-31	Alive	54	Progression	2013-03-15	1	Positive	Positive	Negative	0	0.204	23	58	Stable	Endocrine	No	No	No
211	ONC_CC_11_004001437	81	2015-11-02	2017-07-31	Alive	21	-	-	-	Positive	Positive	Negative	0	0.237	23	95	Stable	No	Chemotherapy	No	No
127	ONC_CC_11_004001228	71	2014-01-29	2017-07-31	Alive	42	Progression	2016-03-21	25	Positive	Positive	Negative	0	0.456	14	89	Stable	Endocrine	No	No	No
167	ONC_CC_11_004001322	70	2014-11-17	2017-07-31	Alive	32	Progression	2016-01-01	13	Positive	Negative	Positive	0	0.673	16	84	Stable	No	No	HER2 therapy	No
171	ONC_CC_11_004001331	55	2014-12-10	2017-07-31	Alive	32	Progression	2015-05-01	4	Positive	Negative	Negative	0	1.613	10	59	Stable	No	No	HER2 therapy	No
182	ONC_CC_11_004001366	57	2015-03-04	2016-09-30	Deceased	19	-	-	-	Negative	Negative	Positive	0	3.45	25	97	Stable	No	No	HER2 therapy	No
90	ONC_CC_11_004001154	68	2013-05-28	2017-07-31	Alive	50	Progression	2016-03-14	33	Positive	Positive	Negative	1	0.024	8	52	Stable	No	Chemotherapy	No	No
88	ONC_CC_11_004001152	92	2013-05-22	2017-07-31	Alive	50	-	-	-	Positive	-	-	1	0.035	19	58	Stable	Endocrine	No	No	No
137	ONC_CC_11_004001247	57	2014-03-12	2017-07-31	Alive	41	Progression	2014-08-27	5	Positive	Negative	Positive	1	0.056	18	101	Stable	No	No	HER2 therapy	No
141	ONC_CC_11_004001255	55	2014-03-31	2017-07-31	Alive	40	Progression	2015-01-12	9	-	-	-	1	0.058	20	67	Stable	Endocrine	No	No	No
123	ONC_CC_11_004001219	71	2014-01-20	2017-07-31	Alive	42	Progression	2014-02-12	0	Positive	Negative	Positive	1	0.211	14	33	Stable	Endocrine	No	No	No
51	ONC_CC_11_004001097	79	2012-09-28	2017-07-31	Alive	58	-	-	-	Positive	Positive	-	3	0.239	29	73	Stable	Endocrine	No	No	No
93	ONC_CC_11_004001160	70	2013-05-29	2017-07-31	Alive	50	-	-	-	Positive	Positive	Negative	44	0.284	14	105	Stable	Endocrine	No	No	No
150	ONC_CC_11_004001277	63	2014-06-11	2017-07-31	Alive	38	Progression	2014-11-27	5	Negative	Negative	Positive	0	0.056	9	94	Responding	No	No	HER2 therapy	No
128	ONC_CC_11_004001230	55	2014-01-29	2017-07-31	Alive	42	Progression	2014-11-26	9	Positive	Positive	Negative	0	0.07	9	106	Responding	Endocrine	No	No	No
83	ONC_CC_11_004001141	44	2013-03-15	2013-10-15	Deceased	7	-	-	-	Positive	Negative	Negative	0	0.108	19	83	Responding	No	Chemotherapy	No	No
138	ONC_CC_11_004001248	69	2014-03-12	2016-06-29	Deceased	28	Progression	2014-10-08	6	Positive	Negative	Negative	0	0.157	15	96	Responding	No	No	No	Off
69	ONC_CC_11_004001118	56	2012-12-03	2014-06-21	Deceased	19	Progression	2013-04-13	4	Positive	Positive	Negative	0	0.165	20	72	Responding	No	Chemotherapy	No	No
55	ONC_CC_11_004001103	48	2012-10-10	2016-08-06	Deceased	46	Progression	2013-12-17	14	Positive	Negative	Positive	1	0.028	18	119	Responding	No	No	No	Off
160	ONC_CC_11_004001302	45	2014-09-01	2017-07-31	Alive	35	Progression	2016-04-21	19	Positive	Negative	Positive	1	0.187	10	68	Responding	No	No	HER2 therapy	No
94	ONC_CC_11_004001161	31	2013-05-29	2015-12-29	Deceased	31	Progression	2013-08-28	2	Positive	Positive	Negative	0	0.051	30	360	Progressive	Endocrine	No	No	No
148	ONC_CC_11_004001274	61	2014-06-04	2014-10-16	Deceased	4	Progression	2014-08-22	2	Negative	Negative	Negative	1	0.342	18	133	Progressive	No	Chemotherapy	No	No
202	ONC_CC_11_004001416	43	2015-08-27	2017-05-04	Deceased	20	Progression	2016-08-01	11	Positive	Positive	Negative	0	0.016	14	33	Progressive	Endocrine	No	No	No
47	ONC_CC_11_004001090	35	2012-09-07	2013-03-19	Deceased	6	Progression	2012-10-02	0	Positive	Positive	Negative	0	0.028	16	81	Progressive	No	No	No	Off
219	ONC_CC_11_004001464	29	2016-01-27	2017-07-31	Alive	18	Progression	2016-02-08	0	Negative	Negative	Positive	0	0.046	7	42	Progressive	No	No	No	Off
173	ONC_CC_11_004001342	50	2015-01-19	2017-07-31	Alive	30	Progression	2015-03-01	1	Positive	Positive	Negative	0	0.052	17	40	Progressive	Endocrine	No	No	No
104	ONC_CC_11_004001177	81	2013-07-26	2013-08-22	Deceased	1	-	-	-	Positive	Positive	Negative	0	0.075	20	83	Progressive	Endocrine	No	No	No
185	ONC_CC_11_004001380	58	2015-04-01	2016-12-19	Deceased	21	-	-	-	Negative	Negative	Negative	0	0.085	31	58	Progressive	No	No	No	Off
159	ONC_CC_11_004001301	81	2014-09-01	2017-07-31	Alive	35	Progression	2014-10-01	1	Positive	Positive	Negative	0	0.123	8	89	Progressive	Endocrine	No	No	No
223	ONC_CC_11_004001484	43	2016-03-09	2017-07-31	Alive	17	-	-	-	Positive	Positive	Negative	0	0.159	21	78	Progressive	No	No	No	Off
216	ONC_CC_11_004001455	29	2016-01-11	2016-07-17	Deceased	6	Progression	2016-03-17	2	Positive	-	-	0	0.166	8	62	Progressive	No	No	No	Off
112	ONC_CC_11_004001198	53	2013-11-06	2017-07-31	Alive	45	Progression	2016-09-06	34	Positive	Positive	Negative	0	0.168	29	83	Progressive	Endocrine	No	No	No
64	ONC_CC_11_004001113	70	2012-11-21	2017-07-31	Alive	56	Progression	2013-01-25	2	Negative	Negative	Positive	0	0.169	16	56	Progressive	No	No	No	Off
56	ONC_CC_11_004001105	69	2012-10-24	2014-04-28	Deceased	18	-	-	-	Negative	Negative	Positive	0	0.188	23	83	Progressive	No	No	No	Off
235	ONC_CC_11_004001540	61	2016-06-30	2017-07-31	Alive	13	Progression	2016-07-01	0	Positive	Positive	Positive	0	0.215	14	75	Progressive	Endocrine	No	No	No
210	ONC_CC_11_004001436	74	2015-11-02	2017-07-31	Alive	21	Progression	2016-07-01	7	Positive	Positive	Positive	0	0.468	31	124	Progressive	Endocrine	No	No	No
184	ONC_CC_11_004001377	63	2015-03-23	2017-07-31	Alive	28	Progression	2015-03-23	0	Negative	Negative	Positive	0	0.698	10	88	Progressive	No	No	HER2 therapy	No
229	ONC_CC_11_004001528	64	2016-06-15	2017-07-31	Alive	14	Progression	2016-11-01	4	Positive	Positive	Negative	1	0.055	21	110	Progressive	Endocrine	No	No	No
155	ONC_CC_11_004001292	73	2014-07-30	2016-01-02	Deceased	17	Progression	2015-08-20	12	Positive	Positive	Negative	1	0.091	28	64	Progressive	No	Chemotherapy	No	No
214	ONC_CC_11_004001441	75	2015-11-16	2016-05-28	Deceased	6	Progression	2015-11-16	0	Negative	Negative	Negative	3	1.275	14	126	Progressive	No	Chemotherapy	No	No
205	ONC_CC_11_004001420	66	2015-09-09	2016-05-09	Deceased	8	Progression	2015-09-09	0	Negative	Negative	Negative	5	0.043	31	98	Progressive	No	No	No	Off
225	ONC_CC_11_004001511	50	2016-05-04	2017-07-31	Alive	15	-	-	-	Positive	Positive	Negative	0	0.104	381	150	Stable	Endocrine	No	No	No
43	ONC_CC_11_004001083	29	2012-09-05	2015-10-03	Deceased	37	Progression	2013-02-07	5	Positive	Positive	Negative	3	0.054	2445	264	Stable	Endocrine	No	No	No
118	ONC_CC_11_004001211	60	2014-01-08	2017-07-31	Alive	43	Progression	2014-01-14	0	Positive	Negative	Negative	8	0.054	33	230	Stable	Endocrine	No	No	No
109	ONC_CC_11_004001192	47	2013-10-07	2014-02-22	Deceased	5	Progression	2013-11-08	1	Positive	Positive	-	48	0.844	188	146	Stable	No	Chemotherapy	No	No
92	ONC_CC_11_004001159	72	2013-05-29	2016-05-24	Deceased	36	Progression	2013-07-04	1	Positive	Positive	Negative	75	0.038	304	171	Stable	Endocrine	No	No	No
44	ONC_CC_11_004001084	72	2012-09-05	2013-01-30	Deceased	5	-	-	-	Positive	Positive	Negative	101	0.336	3346	211	Stable	No	Chemotherapy	No	No
204	ONC_CC_11_004001419	62	2015-09-07	2015-12-19	Deceased	3	Progression	2015-09-21	0	Negative	Negative	Negative	198	0.455	35	282	Stable	No	Chemotherapy	No	No
46	ONC_CC_11_004001089	48	2012-09-05	2017-07-31	Alive	59	-	-	-	Negative	Negative	Negative	0	0.034	43	82	Stable	No	Chemotherapy	No	No
87	ONC_CC_11_004001150	80	2013-05-20	2017-07-31	Alive	50	Progression	2014-04-17	10	Positive	Negative	Negative	0	0.037	38	108	Stable	No	No	No	Off
131	ONC_CC_11_004001238	50	2014-02-19	2017-07-31	Alive	41	-	-	-	Positive	Positive	Negative	0	0.049	379	54	Stable	No	No	No	Off
114	ONC_CC_11_004001207	79	2013-12-18	2017-07-31	Alive	43	Negative	2017-05-08	40	Negative	Negative	Positive	0	0.054	34	101	Stable	No	No	No	Off
84	ONC_CC_11_004001142	61	2013-03-18	2017-07-31	Alive	52	Progression	2013-06-28	3	Positive	Positive	Negative	0	0.075	76	86	Stable	Endocrine	No	No	No
190	ONC_CC_11_004001390	73	2015-05-11	2016-11-04	Deceased	18	Progression	2016-06-01	12	Positive	Positive	Negative	0	0.095	183	115	Stable	No	Chemotherapy	No	No
168	ONC_CC_11_004001325	88	2014-11-26	2015-02-16	Deceased	3	-	-	-	Positive	Negative	Negative	0	0.105	32	58	Stable	Endocrine	No	No	No
231	ONC_CC_11_004001530	68	2016-06-16	2017-07-31	Alive	13	Progression	2016-09-01	2	Positive	Positive	Negative	0	0.134	91	105	Stable	Endocrine	No	No	No
140	ONC_CC_11_004001253	69	2014-03-19	2017-07-31	Alive	40	Progression	2014-06-01	2	Positive	Positive	Negative	0	0.158	375	102	Stable	Endocrine	No	No	No
222	ONC_CC_11_004001480	55	2016-03-02	2017-07-31	Alive	17	-	-	-	Positive	Positive	Positive	0	0.196	200	67	Stable	Endocrine	No	No	No
42	ONC_CC_11_004001082	76	2012-08-31	2013-10-10	Deceased	13	Progression	2012-08-31	0	Negative	Negative	Negative	0	0.199	77	69	Stable	No	Chemotherapy	No	No
230	ONC_CC_11_004001529	38	2016-06-16	2017-07-31	Alive	13	-	-	-	Positive	Positive	Negative	0	0.212	32	74	Stable	Endocrine	No	No	No
85	ONC_CC_11_004001145	57	2013-05-08	2017-07-31	Alive	51	Progression	2013-11-25	6	Positive	-	Negative	1	0.004	104	68	Stable	Endocrine	No	No	No
193	ONC_CC_11_004001399	72	2015-06-02	2017-07-31	Alive	26	Progression	2016-02-01	7	Positive	Negative	Negative	1	0.038	190	30	Stable	Endocrine	No	No	No
97	ONC_CC_11_004001167	76	2013-06-17	2015-02-11	Deceased	20	Progression	2013-08-30	2	Positive	-	-	1	0.066	44	85	Stable	Endocrine	No	No	No
146	ONC_CC_11_004001272	45	2014-05-21	2015-11-09	Deceased	18	Progression	2015-01-01	7	Positive	Positive	Negative	1	0.092	74	89	Stable	Endocrine	No	No	No
75	ONC_CC_11_004001127	44	2013-02-06	2013-06-19	Deceased	4	Progression	2013-04-17	2	Positive	Positive	Negative	1	0.118	178	70	Stable	No	Chemotherapy	No	No
130	ONC_CC_11_004001236	60	2014-02-19	2017-07-31	Alive	41	-	-	-	Positive	-	-	1	0.674	44	86	Stable	Endocrine	No	No	No
151	ONC_CC_11_004001279	75	2014-07-02	2015-03-30	Deceased	9	-	-	-	Positive	Positive	Negative	2	0.118	2369	76	Stable	No	Chemotherapy	No	No
197	ONC_CC_11_004001411	70	2015-07-15	2017-07-31	Alive	25	Progression	2015-10-01	2	Positive	Positive	Negative	2	0.149	37	91	Stable	No	No	No	Off
175	ONC_CC_11_004001346	87	2015-01-28	2015-10-01	Deceased	8	Progression	2015-04-01	2	Positive	Positive	Negative	2	0.168	72	72	Stable	Endocrine	No	No	No
105	ONC_CC_11_004001179	35	2013-07-31	2015-05-05	Deceased	21	Progression	2013-09-25	1	Positive	Positive	Positive	3	0.113	37	95	Stable	Endocrine	No	No	No
60	ONC_CC_11_004001109	51	2012-11-12	2014-07-17	Deceased	20	Progression	2013-03-07	3	Positive	Positive	Positive	5	0.121	59	65	Stable	No	No	HER2 therapy	No
48	ONC_CC_11_004001091	52	2012-09-10	2015-04-07	Deceased	31	Progression	2013-08-20	11	Positive	Positive	Negative	5	0.394	163	58	Stable	Endocrine	No	No	No
136	ONC_CC_11_004001246	56	2014-03-04	2017-07-31	Alive	41	Progression	2014-06-18	3	Positive	Positive	Negative	9	1.005	111	100	Stable	Endocrine	No	No	No
144	ONC_CC_11_004001265	75	2014-05-07	2017-07-31	Alive	39	Progression	2016-05-01	23	Positive	Positive	Negative	11	0.083	158	108	Stable	Endocrine	No	No	No
187	ONC_CC_11_004001386	73	2015-04-27	2015-10-19	Deceased	6	Progression	2015-09-03	4	Positive	Negative	Negative	30	0.407	476	93	Stable	No	Chemotherapy	No	No
86	ONC_CC_11_004001146	81	2013-05-08	2015-06-21	Deceased	25	Progression	2014-05-15	12	Positive	Positive	-	0	0.049	36	177	Responding	No	Chemotherapy	No	No
70	ONC_CC_11_004001119	55	2012-12-05	2013-06-14	Deceased	6	Progression	2012-12-05	0	Positive	Positive	Negative	64	0.02	3613	251	Responding	No	Chemotherapy	No	No
170	ONC_CC_11_004001327	76	2014-12-03	2017-07-31	Alive	32	Progression	2016-02-01	13	Positive	Negative	Negative	0	0.04	36	74	Responding	Endocrine	No	No	No
189	ONC_CC_11_004001388	48	2015-05-05	2017-07-31	Alive	27	Negative	2017-05-08	24	Positive	Positive	Negative	0	0.076	100	69	Responding	No	Chemotherapy	No	No
80	ONC_CC_11_004001132	63	2013-02-06	2014-06-05	Deceased	16	Progression	2013-08-29	6	Positive	Positive	Negative	0	0.083	130	50	Responding	Endocrine	No	No	No
78	ONC_CC_11_004001130	47	2013-02-06	2014-09-10	Deceased	19	Progression	2013-10-23	8	Positive	Positive	Negative	0	0.09	34	89	Responding	No	No	HER2 therapy	No
188	ONC_CC_11_004001387	50	2015-04-29	2017-07-31	Alive	27	-	-	-	Positive	Positive	Negative	0	0.095	40	57	Responding	Endocrine	No	No	No
194	ONC_CC_11_004001401	82	2015-06-10	2016-06-13	Deceased	12	-	-	-	Positive	Positive	Negative	0	0.096	34	47	Responding	No	Chemotherapy	No	No
66	ONC_CC_11_004001115	83	2012-11-21	2017-07-31	Alive	56	Progression	2012-09-27	0	Negative	-	Positive	0	0.107	59	85	Responding	No	Chemotherapy	No	No
115	ONC_CC_11_004001208	68	2013-12-18	2016-09-20	Deceased	33	Progression	2016-01-20	25	Negative	Positive	Negative	0	0.119	33	119	Responding	Endocrine	No	No	No
38	ONC_CC_11_004001076	57	2012-08-29	2015-10-30	Deceased	38	Progression	2012-08-29	0	Positive	-	Positive	0	0.137	199	96	Responding	No	Chemotherapy	No	No
37	ONC_CC_11_004001075	65	2012-08-29	2014-09-19	Deceased	25	Progression	2012-10-24	1	Positive	Positive	Negative	0	0.147	126	89	Responding	No	Chemotherapy	No	No
165	ONC_CC_11_004001308	47	2014-09-15	2017-07-31	Alive	34	-	-	-	Positive	Positive	Negative	0	0.147	251	54	Responding	Endocrine	No	No	No
228	ONC_CC_11_004001527	55	2016-06-15	2017-07-31	Alive	14	Progression	2017-02-01	7	Positive	Positive	Negative	0	0.208	66	104	Responding	Endocrine	No	No	No
108	ONC_CC_11_004001191	52	2013-10-07	2017-07-31	Alive	46	Progression	2014-09-05	10	Positive	Positive	Negative	0	0.236	42	63	Responding	No	Chemotherapy	No	No
61	ONC_CC_11_004001110	36	2012-11-19	2013-07-27	Deceased	8	-	-	-	-	-	Positive	1	0.052	207	69	Responding	No	No	HER2 therapy	No
79	ONC_CC_11_004001131	43	2013-02-06	2015-01-19	Deceased	23	Progression	2013-06-12	4	Positive	-	Negative	1	0.06	147	124	Responding	No	Chemotherapy	No	No
224	ONC_CC_11_004001505	76	2016-04-20	2017-01-15	Deceased	9	Progression	2017-01-01	8	Positive	Positive	Negative	1	0.116	47	56	Responding	Endocrine	No	No	No
172	ONC_CC_11_004001336	44	2015-01-14	2017-07-31	Alive	31	Progression	2015-06-01	4	Positive	Positive	Negative	2	0.162	353	74	Responding	Endocrine	No	No	No
59	ONC_CC_11_004001108	75	2012-11-07	2013-03-03	Deceased	4	-	-	-	Negative	Negative	Negative	3	0.12	36	71	Responding	No	Chemotherapy	No	No
40	ONC_CC_11_004001079	67	2012-08-31	2014-11-23	Deceased	27	Progression	2012-08-31	0	Positive	Negative	Negative	3	0.165	442	97	Responding	No	Chemotherapy	No	No
62	ONC_CC_11_004001111	57	2012-11-21	2013-04-18	Deceased	5	Progression	2013-04-05	4	Negative	Negative	Negative	3	0.204	193	69	Responding	No	Chemotherapy	No	No
117	ONC_CC_11_004001210	76	2014-01-08	2016-08-05	Deceased	31	Progression	2015-01-02	11	Positive	Positive	-	114	0.177	114	106	Responding	Endocrine	No	No	No
72	ONC_CC_11_004001124	51	2013-01-23	2013-07-07	Deceased	5	Progression	2013-02-07	0	Positive	Positive	Negative	0	0.019	602	141	Progressive	No	Chemotherapy	No	No
124	ONC_CC_11_004001221	52	2014-01-22	2015-05-19	Deceased	16	Progression	2014-07-10	5	Positive	Negative	Negative	0	0.039	45	173	Progressive	Endocrine	No	No	No
95	ONC_CC_11_004001165	75	2013-06-14	2017-07-31	Alive	50	Negative	2017-05-08	46	Negative	Negative	Negative	0	0.072	37	173	Progressive	No	Chemotherapy	No	No
67	ONC_CC_11_004001116	54	2012-11-21	2014-02-28	Deceased	15	Progression	2012-11-21	0	Positive	Positive	Positive	0	0.137	602	329	Progressive	No	No	HER2 therapy	No
157	ONC_CC_11_004001295	84	2014-08-11	2016-01-14	Deceased	17	Progression	2014-09-01	0	Positive	Positive	Negative	0	0.177	177	234	Progressive	Endocrine	No	No	No
106	ONC_CC_11_004001186	47	2013-09-16	2017-07-31	Alive	46	-	-	-	Positive	-	Negative	0	0.258	68	132	Progressive	No	Chemotherapy	No	No
232	ONC_CC_11_004001535	56	2016-06-27	2016-10-18	Deceased	4	Progression	2016-07-01	0	Positive	Positive	Positive	0	1.143	479	299	Progressive	No	Chemotherapy	No	No
179	ONC_CC_11_004001361	72	2015-03-02	2017-07-31	Alive	29	Progression	2015-03-02	0	Positive	Positive	-	0	1.599	156	172	Progressive	No	Chemotherapy	No	No
57	ONC_CC_11_004001106	37	2012-11-05	2013-01-13	Deceased	2	Progression	2012-12-26	1	Positive	Positive	Positive	3	0.346	153	525	Progressive	No	No	HER2 therapy	No
103	ONC_CC_11_004001176	49	2013-07-19	2014-07-20	Deceased	12	Progression	2013-08-20	1	Negative	Negative	Negative	4	0.229	209	150	Progressive	No	No	No	Off
149	ONC_CC_11_004001276	54	2014-06-11	2015-01-17	Deceased	7	Progression	2014-09-22	3	Positive	Positive	Negative	5	0.586	33	145	Progressive	Endocrine	No	No	No
139	ONC_CC_11_004001252	67	2014-03-17	2014-05-22	Deceased	2	-	-	-	Positive	-	-	7	0.222	201	148	Progressive	Endocrine	No	No	No
218	ONC_CC_11_004001461	46	2016-01-20	2017-07-31	Alive	18	Progression	2016-02-01	0	Positive	Negative	Negative	10	0.584	41	150	Progressive	Endocrine	No	No	No
177	ONC_CC_11_004001357	41	2015-02-18	2015-09-26	Deceased	7	Progression	2015-06-01	3	Positive	Positive	Negative	10	1.171	590	184	Progressive	Endocrine	No	No	No
134	ONC_CC_11_004001242	66	2014-03-04	2015-05-27	Deceased	15	Progression	2014-03-31	0	Positive	Positive	Negative	12	0.06	107	135	Progressive	Endocrine	No	No	No
125	ONC_CC_11_004001224	61	2014-01-27	2014-08-09	Deceased	6	Progression	2014-02-18	0	Positive	-	-	12	0.191	125	150	Progressive	Endocrine	No	No	No
217	ONC_CC_11_004001458	64	2016-01-13	2017-07-31	Alive	19	-	-	-	Positive	Positive	Negative	13	0.222	265	201	Progressive	Endocrine	No	No	No
50	ONC_CC_11_004001096	89	2012-09-18	2014-07-12	Deceased	22	Progression	2014-06-27	21	Positive	Positive	Negative	17	0.222	1175	181	Progressive	Endocrine	No	No	No
143	ONC_CC_11_004001259	52	2014-04-14	2015-11-22	Deceased	19	Progression	2015-06-01	13	Positive	-	Negative	21	0.467	105	199	Progressive	No	No	No	Off
183	ONC_CC_11_004001373	41	2015-03-16	2017-07-31	Alive	29	Progression	2015-04-01	0	Positive	Positive	Negative	25	0.108	629	157	Progressive	Endocrine	No	No	No
145	ONC_CC_11_004001271	73	2014-05-19	2014-10-29	Deceased	5	Progression	2014-09-17	3	Positive	Negative	Negative	32	0.577	49	161	Progressive	No	Chemotherapy	No	No
178	ONC_CC_11_004001358	81	2015-02-24	2015-07-10	Deceased	4	-	-	-	-	-	-	40	5.46	74	168	Progressive	Endocrine	No	No	No
129	ONC_CC_11_004001235	72	2014-02-19	2014-04-22	Deceased	2	-	-	-	Positive	Negative	Negative	42	0.031	144	349	Progressive	No	No	No	Off
212	ONC_CC_11_004001439	49	2015-11-11	2016-11-30	Deceased	13	Progression	2016-03-01	3	Positive	Positive	Negative	48	4.728	76	145	Progressive	No	Chemotherapy	No	No
111	ONC_CC_11_004001197	80	2013-10-23	2017-07-31	Alive	45	Progression	2013-10-23	0	Positive	Negative	Positive	53	0.13	101	322	Progressive	No	No	No	Off
158	ONC_CC_11_004001297	76	2014-08-18	2014-10-12	Deceased	2	-	-	-	Positive	Positive	Negative	54	3.551	1248	382	Progressive	Endocrine	No	No	No
162	ONC_CC_11_004001304	68	2014-09-04	2015-08-19	Deceased	11	Progression	2015-05-01	7	Positive	Positive	-	129	0.517	99	293	Progressive	No	No	No	Off
63	ONC_CC_11_004001112	57	2012-11-21	2013-02-07	Deceased	3	-	-	-	Positive	Positive	Negative	448	0.361	765	555	Progressive	Endocrine	No	No	No
73	ONC_CC_11_004001125	61	2013-01-30	2013-02-23	Deceased	1	Progression	2013-01-23	0	Negative	Positive	Positive	701	0.452	347	197	Progressive	Endocrine	No	No	No
82	ONC_CC_11_004001137	67	2013-03-04	2017-07-31	Alive	53	Progression	2013-09-02	5	Positive	Positive	Negative	0	0.007	923	110	Progressive	No	Chemotherapy	No	No
234	ONC_CC_11_004001539	59	2016-06-29	2017-01-10	Deceased	6	Progression	2016-08-08	1	Negative	Negative	Negative	0	0.068	45	89	Progressive	No	No	No	Off
147	ONC_CC_11_004001273	74	2014-05-22	2016-09-21	Deceased	28	Progression	2014-11-01	5	Positive	-	-	0	0.073	82	107	Progressive	Endocrine	No	No	No
77	ONC_CC_11_004001129	54	2013-02-06	2015-01-29	Deceased	24	Progression	2013-02-22	0	Positive	Positive	Negative	0	0.096	33	60	Progressive	No	No	HER2 therapy	No
226	ONC_CC_11_004001520	69	2016-06-02	2017-07-31	Alive	14	Progression	2017-01-01	6	Positive	-	-	0	0.103	168	72	Progressive	Endocrine	No	No	No
68	ONC_CC_11_004001117	58	2012-11-21	2017-07-31	Alive	56	Progression	2013-03-28	4	Positive	Positive	Positive	0	0.108	371	97	Progressive	Endocrine	No	No	No
196	ONC_CC_11_004001409	50	2015-07-13	2017-07-31	Alive	25	Progression	2015-07-13	0	Positive	Positive	Negative	0	0.124	395	93	Progressive	Endocrine	No	No	No
113	ONC_CC_11_004001201	54	2013-12-09	2017-07-31	Alive	44	Progression	2015-08-19	20	Positive	Positive	Negative	0	0.153	72	108	Progressive	Endocrine	No	No	No
221	ONC_CC_11_004001479	49	2016-03-02	2017-07-31	Alive	17	Progression	2016-03-02	0	Negative	Negative	Negative	0	0.157	65	67	Progressive	No	No	No	Off
107	ONC_CC_11_004001188	58	2013-10-02	2017-07-31	Alive	46	Progression	2013-11-14	1	Positive	Negative	Negative	0	0.174	239	95	Progressive	No	Chemotherapy	No	No
76	ONC_CC_11_004001128	71	2013-02-06	2014-02-18	Deceased	12	Progression	2013-05-28	3	Positive	-	Negative	0	0.195	37	67	Progressive	No	Chemotherapy	No	No
45	ONC_CC_11_004001088	68	2012-09-05	2017-07-31	Alive	59	-	-	-	Positive	Positive	Negative	0	0.248	139	107	Progressive	No	Chemotherapy	No	No
198	ONC_CC_11_004001412	52	2015-07-20	2017-07-31	Alive	24	-	-	-	Positive	Negative	Negative	0	0.262	432	67	Progressive	Endocrine	No	No	No
166	ONC_CC_11_004001311	69	2014-09-22	2017-07-31	Alive	34	Progression	2014-12-01	2	Positive	Negative	Negative	0	0.599	97	56	Progressive	Endocrine	No	No	No
142	ONC_CC_11_004001256	56	2014-04-02	2014-12-21	Deceased	9	Progression	2014-05-01	0	Positive	Positive	Negative	0	0.907	83	70	Progressive	No	Chemotherapy	No	No
164	ONC_CC_11_004001307	68	2014-09-10	2015-06-18	Deceased	9	-	-	-	Positive	Positive	Negative	0	1.11	90	84	Progressive	No	Chemotherapy	No	No
181	ONC_CC_11_004001364	63	2015-03-04	2017-07-31	Alive	29	Progression	2015-04-01	0	Positive	Positive	Negative	0	2.2	42	68	Progressive	No	Chemotherapy	No	No
120	ONC_CC_11_004001213	64	2014-01-08	2015-01-03	Deceased	12	Progression	2014-01-20	0	Positive	Positive	Negative	1	0.062	59	39	Progressive	Endocrine	No	No	No
36	ONC_CC_11_004001074	72	2012-08-29	2013-02-11	Deceased	5	Progression	2012-08-29	0	Negative	Negative	Positive	1	0.111	49	90	Progressive	No	No	HER2 therapy	No
54	ONC_CC_11_004001102	53	2012-10-10	2015-12-02	Deceased	38	Progression	2013-04-11	6	Positive	Positive	Positive	2	0.05	60	66	Progressive	Endocrine	No	No	No
133	ONC_CC_11_004001241	55	2014-02-26	2017-07-31	Alive	41	Progression	2015-01-28	11	Positive	Positive	Negative	2	0.077	51	68	Progressive	Endocrine	No	No	No
174	ONC_CC_11_004001343	52	2015-01-26	2016-03-20	Deceased	14	Progression	2015-02-01	0	Positive	Positive	Negative	2	0.111	282	114	Progressive	No	Chemotherapy	No	No
91	ONC_CC_11_004001156	37	2013-05-29	2017-07-31	Alive	50	Progression	2014-02-26	8	Positive	Negative	Negative	3	0.038	71	85	Progressive	No	Chemotherapy	No	No
209	ONC_CC_11_004001429	59	2015-10-07	2017-07-31	Alive	22	Progression	2016-05-01	6	Positive	Positive	-	3	0.097	111	122	Progressive	No	Chemotherapy	No	No
49	ONC_CC_11_004001095	63	2012-09-14	2012-10-30	Deceased	2	-	-	-	Positive	Positive	-	3	0.328	336	95	Progressive	No	No	No	Off
98	ONC_CC_11_004001169	63	2013-06-19	2017-07-31	Alive	49	Progression	2013-08-06	1	Positive	Positive	Negative	3	0.494	193	76	Progressive	No	Chemotherapy	No	No
215	ONC_CC_11_004001452	38	2016-01-06	2017-07-31	Alive	19	Progression	2016-06-01	4	Positive	Positive	Negative	4	0.195	88	70	Progressive	Endocrine	No	No	No
41	ONC_CC_11_004001081	54	2012-08-31	2014-08-17	Deceased	24	Progression	2013-08-30	11	Positive	Positive	Negative	4	0.413	116	121	Progressive	No	Chemotherapy	No	No
135	ONC_CC_11_004001245	71	2014-03-04	2017-07-31	Alive	41	Progression	2014-06-17	3	Positive	Positive	-	5	0.626	412	48	Progressive	Endocrine	No	No	No
100	ONC_CC_11_004001172	60	2013-06-19	2013-12-17	Deceased	6	Progression	2013-09-13	2	Positive	Negative	Negative	6	0.114	83	111	Progressive	No	No	No	Off
152	ONC_CC_11_004001284	66	2014-07-21	2015-06-08	Deceased	11	Progression	2015-01-01	5	Positive	Positive	Negative	8	0.104	112	99	Progressive	Endocrine	No	No	No
191	ONC_CC_11_004001391	47	2015-05-13	2015-10-08	Deceased	5	Progression	2015-06-05	0	Positive	Positive	Negative	8	1.221	192	92	Progressive	No	No	HER2 therapy	No
180	ONC_CC_11_004001363	42	2015-03-03	2017-07-31	Alive	29	Progression	2015-03-03	0	-	-	-	11	0.859	40	101	Progressive	Endocrine	No	No	No
206	ONC_CC_11_004001424	49	2015-09-28	2015-12-24	Deceased	3	Progression	2015-09-28	0	Negative	Negative	Negative	15	0.549	201	94	Progressive	No	No	No	Off
161	ONC_CC_11_004001303	71	2014-09-03	2015-07-07	Deceased	10	Progression	2014-09-16	0	Positive	Positive	Negative	16	0.062	93	77	Progressive	No	No	No	Off
102	ONC_CC_11_004001175	58	2013-07-10	2015-10-12	Deceased	27	Progression	2014-04-16	9	Positive	Positive	Negative	40	1.76	115	76	Progressive	No	No	No	Off
192	ONC_CC_11_004001397	55	2015-05-20	2017-07-31	Alive	26	Progression	2015-10-01	4	Positive	Positive	Negative	43	0.091	107	106	Progressive	Endocrine	No	No	No
176	ONC_CC_11_004001353	40	2015-02-11	2017-07-31	Alive	30	Progression	2015-04-01	1	Positive	Positive	Negative	123	4.45	948	94	Progressive	Endocrine	No	No	No
208	ONC_CC_11_004001427	68	2015-10-02	2016-02-10	Deceased	4	Progression	2015-10-02	0	-	-	-	264	0.647	190	108	Progressive	No	No	No	Off
53	ONC_CC_11_004001100	73	2012-10-05	2012-11-14	Deceased	1	-	-	-	-	-	-	448	0.453	268	115	Progressive	Endocrine	No	No	No
233	ONC_CC_11_004001536	67	2016-06-27	2016-10-18	Deceased	4	-	-	-	Positive	Negative	Negative	6848	0.11	252	71	Progressive	Endocrine	No	No	No
