# Supplementary material for: Plasma cell-free DNA (cfDNA) as a predictive and prognostic marker in patients with metastatic breast cancer
Source: Breast Cancer Res. 2019 Dec 19;21:149. doi: 10.1186/s13058-019-1235-8 (PMC6924016; doi:10.1186/s13058-019-1235-8)
Supplement: Supplementary file 3 — Additional file 3: Non-parametric correlation and linear regression analysis of the four biomarkers included in the study, as continuous variables, against tumour volume and number of metastatic sites. Mann-Whitney-Wilcoxon non parametric test and logistic regression analysis between stratified biomarkers and response categories against tumour volume and number of metastatics sites used as continuous variables, showing the p-value (multivariate analysis). Overall survival analysis of metastatic breast cancer patients, showing the p-value (univariate and multivariate analysis). Table including data regarding relationship between biomarkers, overall survival of patients and tumour bulk. [file 13058_2019_1235_MOESM3_ESM.xlsx]

## Sheet: Supplementary Table 2
	Supplementary Table 2. Composite table with information of all the 39 samples included in the pilot study.
Record ID	Sample ID	Age (y)	Start time (collection)	End of study	Status	Follow up time (months)	Progression	Date of progression	Progression follow up time (months)	CTC counts	cfDNA yield	CA15-3 levels	AP levels	Response	Endocrine	Chemotherapy	HER2-targeted therapy	Off treatment	Total volume METs	Vol 1	Vol 2	Vol 3	Vol 4	Vol 5	Vol 6	Vol 7	Vol 8	# Sites (non measurable)	Bone Mets Score	Pleural disease score	Peritoneal disease score	# Sites (measurable)	Lung mets score	Liver mets score	Brain mets score (no data)	Cutaneous disease score	Lymphangitis	# Sites (Total)
40	ONC_CC_11_004001079	67	2012-08-31	2014-11-23	Deceased	27	Progression	2012-08-31	0	3	0.165	442	97	Responding	No	Chemotherapy	No	No	54.19	22.07	38.7	0.8	0	0	0	0	0	3	3	0	0	3	1	2	NA	0	0	6
48	ONC_CC_11_004001091	52	2012-09-10	2015-04-07	Deceased	31	Progression	2013-08-20	11	5	0.394	163	58	Stable	Endocrine	No	No	No	0	0	0	0	0	0	0	0	0	3	3	0	0	0	0	0	NA	0	0	3
54	ONC_CC_11_004001102	53	2012-10-10	2015-12-02	Deceased	38	Progression	2013-04-11	6	2	0.05	60	66	Progressive	Endocrine	No	No	No	0	0	0	0	0	0	0	0	0	1	1	0	0	0	0	0	NA	0	0	1
55	ONC_CC_11_004001103	48	2012-10-10	2016-08-06	Deceased	46	Progression	2013-12-17	14	1	0.028	18	119	Responding	No	No	No	Off	0	0	0	0	0	0	0	0	0	1	0	1	0	0	0	0	NA	0	0	1
58	ONC_CC_11_004001107	49	2012-11-05	2017-07-31	Alive	57	Progression	2013-05-29	6	0	0.108	18	68	Stable	Endocrine	No	No	No	0	0	0	0	0	0	0	0	0	1	1	0	0	0	0	0	NA	0	0	1
66	ONC_CC_11_004001115	83	2012-11-21	2017-07-31	Alive	56	Progression	2012-09-27	0	0	0.107	59	85	Responding	No	Chemotherapy	No	No	0.52	30.08	1.76	0	0	0	0	0	0	1	1	0	0	2	1	1	NA	0	0	3
72	ONC_CC_11_004001124	51	2013-01-23	2013-07-07	Deceased	5	Progression	2013-02-07	0	0	0.019	602	141	Progressive	No	Chemotherapy	No	No	3.23	3.87	0	0	0	0	0	0	0	4	1	1	2	1	0	1	NA	0	0	5
73	ONC_CC_11_004001125	61	2013-01-30	2013-02-23	Deceased	1	Progression	2013-01-23	0	701	0.452	347	197	Progressive	Endocrine	No	No	No	717.79	52.36	0	0	0	0	0	0	0	1	1	0	0	4	0	3	NA	0	1	5
74	ONC_CC_11_004001126	57	2013-01-30	2017-07-31	Alive	54	-	-	-	0	0.016	19	111	Stable	No	Chemotherapy	No	No	1.41	0	0	0	0	0	0	0	0	0	0	0	0	0	0	0	NA	0	0	0
75	ONC_CC_11_004001127	44	2013-02-06	2013-06-19	Deceased	4	Progression	2013-04-17	2	1	0.118	178	70	Stable	No	Chemotherapy	No	No	0	0	0	0	0	0	0	0	0	3	2	1	0	0	0	0	NA	0	0	3
81	ONC_CC_11_004001133	32	2013-02-11	2017-07-31	Alive	54	Progression	2013-03-15	1	0	0.204	23	58	Stable	Endocrine	No	No	No	73.06	0.52	0	0	0	0	0	0	0	2	2	0	0	1	0	1	NA	0	0	3
84	ONC_CC_11_004001142	61	2013-03-18	2017-07-31	Alive	52	Progression	2013-06-28	3	0	0.075	76	86	Stable	Endocrine	No	No	No	0	0	0	0	0	0	0	0	0	1	1	0	0	0	0	0	0	0	0	1
85	ONC_CC_11_004001145	57	2013-05-08	2017-07-31	Alive	51	Progression	2013-11-25	6	1	0.004	104	68	Stable	Endocrine	No	No	No	0	0	0	0	0	0	0	0	0	1	1	0	0	0	0	0	NA	0	0	1
91	ONC_CC_11_004001156	37	2013-05-29	2017-07-31	Alive	50	Progression	2014-02-26	8	3	0.038	71	85	Progressive	No	Chemotherapy	No	No	281.49	156.23	98.52	87.26	0	0	0	0	0	0	0	0	0	3	3	0	NA	0	0	3
102	ONC_CC_11_004001175	58	2013-07-10	2015-10-12	Deceased	27	Progression	2014-04-16	9	40	1.76	115	76	Progressive	No	No	No	Off	0	0	0	0	0	0	0	0	0	2	2	0	0	0	0	0	NA	0	0	2
107	ONC_CC_11_004001188	58	2013-10-02	2017-07-31	Alive	46	Progression	2013-11-14	1	0	0.174	239	95	Progressive	No	Chemotherapy	No	No	3212.97	52.6	0	0	0	0	0	0	0	0	0	0	0	1	0	1	NA	0	0	1
109	ONC_CC_11_004001192	47	2013-10-07	2014-02-22	Deceased	5	Progression	2013-11-08	1	48	0.844	188	146	Stable	No	Chemotherapy	No	No	23.5	63.17	0	0	0	0	0	0	0	3	3	0	0	1	0	1	NA	0	0	4
110	ONC_CC_11_004001193	52	2013-10-09	2017-07-31	Alive	46	Progression	2015-07-09	21	0	0.074	25	57	Stable	No	No	HER2 therapy	No	0	0	0	0	0	0	0	0	0	1	1	0	0	0	0	0	NA	0	0	1
113	ONC_CC_11_004001201	54	2013-12-09	2017-07-31	Alive	44	Progression	2015-08-19	20	0	0.153	72	108	Progressive	Endocrine	No	No	No	3.92	14.7	0	0	0	0	0	0	0	0	0	0	0	0	0	0	NA	0	0	0
118	ONC_CC_11_004001211	60	2014-01-08	2017-07-31	Alive	43	Progression	2014-01-14	0	8	0.054	33	230	Stable	Endocrine	No	No	No	0	0	0	0	0	0	0	0	0	1	1	0	0	0	0	0	NA	0	0	1
125	ONC_CC_11_004001224	61	2014-01-27	2014-08-09	Deceased	6	Progression	2014-02-18	0	12	0.191	125	150	Progressive	Endocrine	No	No	No	0.13	5.03	1.21	0.08	0	0	0	0	0	3	3	0	0	4	3	1	NA	0	0	7
132	ONC_CC_11_004001239	73	2014-02-26	2017-07-31	Alive	41	-	-	-	0	0.126	17	101	Stable	Endocrine	No	No	No	0	0	0	0	0	0	0	0	0	1	1	0	0	0	0	0	NA	0	0	1
133	ONC_CC_11_004001241	55	2014-02-26	2017-07-31	Alive	41	Progression	2015-01-28	11	2	0.077	51	68	Progressive	Endocrine	No	No	No	0	0	0	0	0	0	0	0	0	1	0	1	0	0	0	0	NA	0	0	1
134	ONC_CC_11_004001242	66	2014-03-04	2015-05-27	Deceased	15	Progression	2014-03-31	0	12	0.06	107	135	Progressive	Endocrine	No	No	No	15.95	14.33	20.73	33.72	0	0	0	0	0	2	2	0	0	1	1	0	NA	0	0	3
146	ONC_CC_11_004001272	45	2014-05-21	2015-11-09	Deceased	18	Progression	2015-01-01	7	1	0.092	74	89	Stable	Endocrine	No	No	No	5.23	1.06	0	0	0	0	0	0	0	3	3	0	0	0	0	0	NA	0	0	3
147	ONC_CC_11_004001273	74	2014-05-22	2016-09-21	Deceased	28	Progression	2014-11-01	5	0	0.073	82	107	Progressive	Endocrine	No	No	No	0.15	0.9	0	0	0	0	0	0	0	1	1	0	0	2	2	0	NA	0	0	3
150	ONC_CC_11_004001277	63	2014-06-11	2017-07-31	Alive	38	Progression	2014-11-27	5	0	0.056	9	94	Responding	No	No	HER2 therapy	No	0	0	0	0	0	0	0	0	0	1	1	0	0	0	0	0	NA	0	0	1
152	ONC_CC_11_004001284	66	2014-07-21	2015-06-08	Deceased	11	Progression	2015-01-01	5	8	0.104	112	99	Progressive	Endocrine	No	No	No	11.75	5.86	0	0	0	0	0	0	0	1	1	0	0	0	0	0	NA	0	0	1
154	ONC_CC_11_004001289	76	2014-07-23	2017-07-31	Alive	36	-	-	-	0	0.022	11	92	Stable	Endocrine	No	No	No	0	0	0	0	0	0	0	0	0	0	0	0	0	0	0	0	NA	0	0	0
155	ONC_CC_11_004001292	73	2014-07-30	2016-01-02	Deceased	17	Progression	2015-08-20	12	1	0.091	28	64	Progressive	No	Chemotherapy	No	No	0	0	0	0	0	0	0	0	0	0	0	0	0	2	0	0	NA	2	0	2
165	ONC_CC_11_004001308	47	2014-09-15	2017-07-31	Alive	34	-	-	-	0	0.147	251	54	Responding	Endocrine	No	No	No	11.06	2.35	42.98	30.96	0	0	0	0	0	3	3	0	0	2	1	0	NA	0	1	5
171	ONC_CC_11_004001331	55	2014-12-10	2017-07-31	Alive	32	Progression	2015-05-01	4	0	1.613	10	59	Stable	No	No	HER2 therapy	No	3.23	3.62	2.26	0	0	0	0	0	0	1	1	0	0	1	0	0	NA	1	0	2
176	ONC_CC_11_004001353	40	2015-02-11	2017-07-31	Alive	30	Progression	2015-04-01	1	123	4.45	948	94	Progressive	Endocrine	No	No	No	2.41	3.62	0.03	0	0	0	0	0	0	4	1	1	2	0	0	0	NA	0	0	4
189	ONC_CC_11_004001388	48	2015-05-05	2017-07-31	Alive	27	Negative	2017-05-08	24	0	0.076	100	69	Responding	No	Chemotherapy	No	No	27.75	0	0	0	0	0	0	0	0	2	1	1	0	0	0	0	NA	0	0	2
190	ONC_CC_11_004001390	73	2015-05-11	2016-11-04	Deceased	18	Progression	2016-06-01	12	0	0.095	183	115	Stable	No	Chemotherapy	No	No	0	0	0	0	0	0	0	0	0	1	1	0	0	0	0	0	NA	0	0	1
199	ONC_CC_11_004001413	66	2015-07-30	2017-07-31	Alive	24	Negative	2017-05-08	21	0	0.105	8	81	Stable	Endocrine	No	No	No	0	0	0	0	0	0	0	0	0	1	1	0	0	0	0	0	NA	0	0	1
